# Supplementary material
Source: PubMed Central journal article supplement (PMC5272181)
Supplement: jci-127-88477-s001.pdf [file jci-127-88477-s001.pdf]

Figure S1

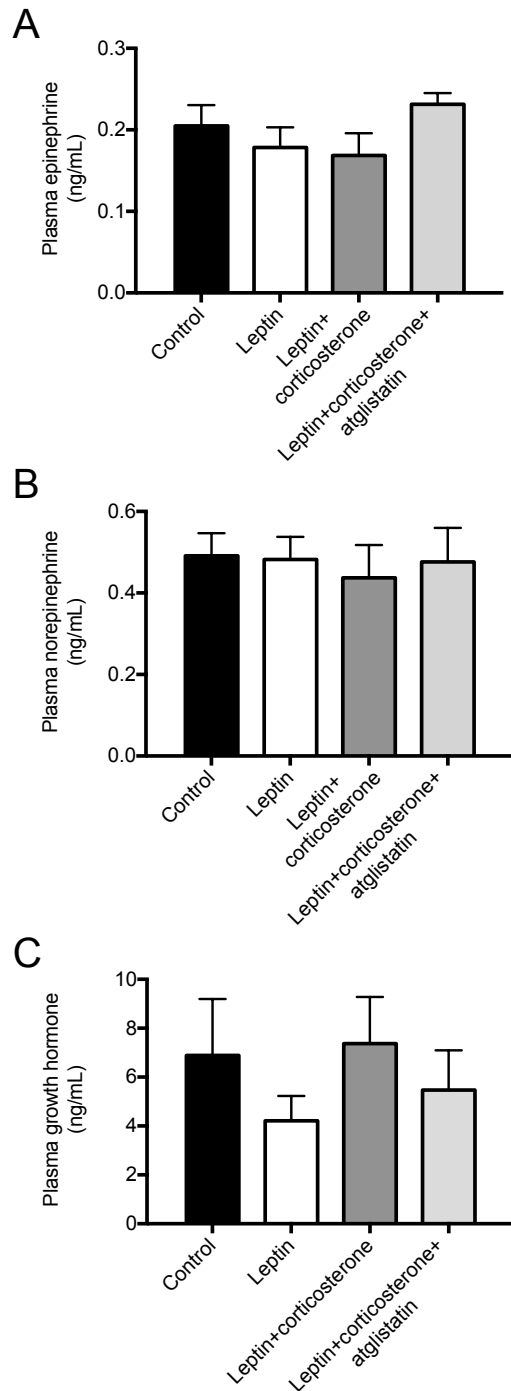

**Fig. S1.** Leptin's acute effect to reverse DKA results from suppression of hypercortisolemia. (A)-(C) Plasma epinephrine, norepinephrine, and growth hormone concentrations after a 6 hr infusion of leptin±corticosterone±atglisatin. There were no differences between groups by ANOVA with Bonferroni's multiple comparisons test. Data are the mean ± S.E.M. of n=7 (control), 7 (leptin), 10 (leptin+corticosterone), and 6 (leptin+corticosterone+atglisatin).

Figure S2

A

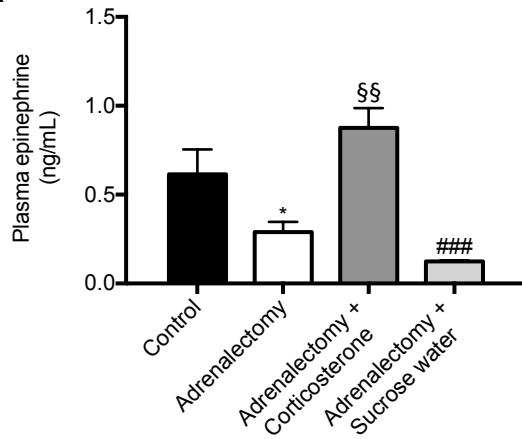

B

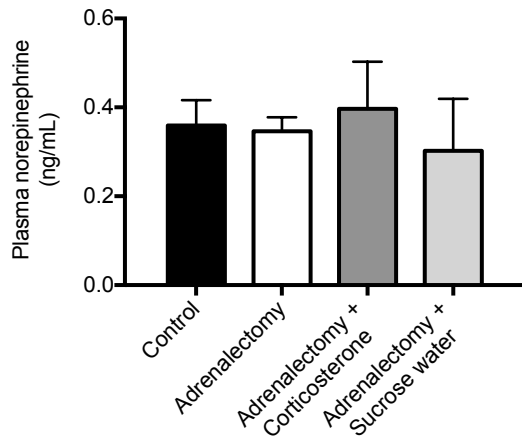

C

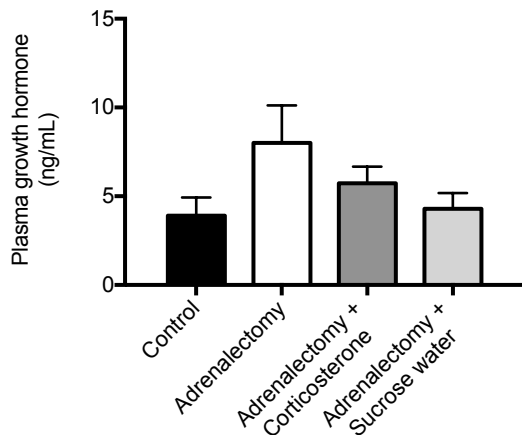

**Fig. S2. Hypercorticism is necessary for DKA in fasted rats.** (A)-(C) Plasma epinephrine, norepinephrine, and growth hormone concentrations. In all panels, data are the mean  $\pm$  S.E.M. of n=8 (control), 11 (adrenalectomy), 8 (adrenalectomy+corticosterone), and 6 (adrenalectomy+sucrose water) per group. \* $P$ <0.05, §§  $P$ <0.01, ###  $P$ <0.001 vs. adrenalectomized rats by ANOVA with Bonferroni's multiple comparisons test.

# Figure S3

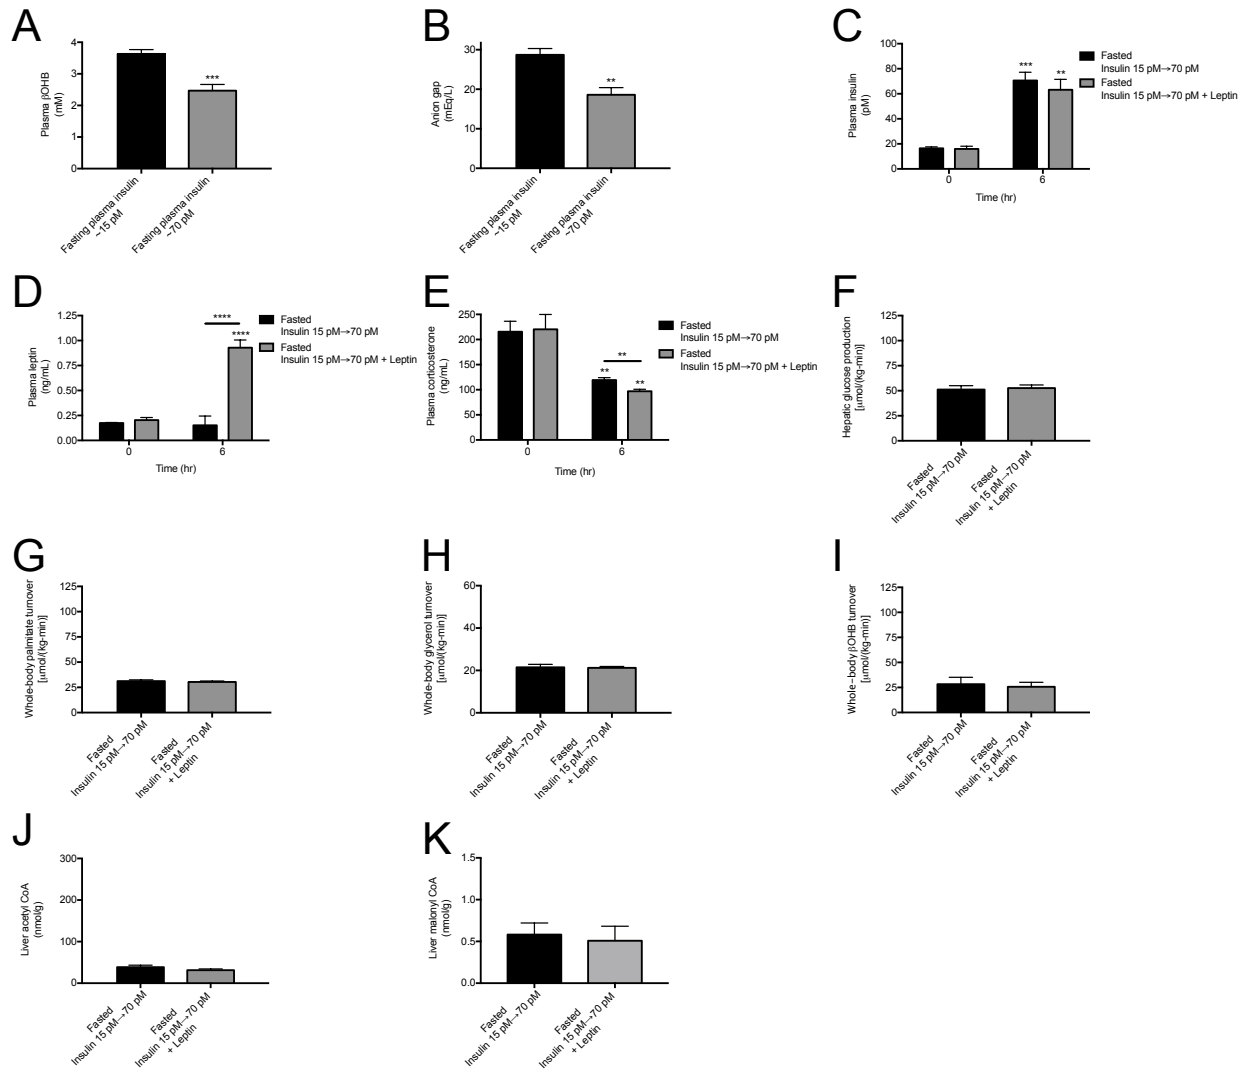

**Fig. S3. Leptin has little to no acute effect in rats with plasma insulin ~70 pM.** (A)-(B) Plasma  $\beta$ OHB concentrations and anion gap in rats with endogenous fasting plasma insulin concentrations ~15 pM and ~70 pM. (C)-(E) Plasma insulin, leptin, and corticosterone concentrations in T1D rats infused with insulin to achieve plasma insulin concentrations ~70 pM. (F)-(I) Hepatic glucose production, palmitate, glycerol, and  $\beta$ OHB turnover. (J)-(K) Liver acetyl and malonyl CoA concentrations. In all panels, data are the mean  $\pm$  S.E.M. of n=6 per group. \*\* $P$ <0.01, \*\*\* $P$ <0.001, \*\*\*\* $P$ <0.0001, with asterisks directly over the bars representing comparisons to the same group at time zero by the 2-tailed paired Student's t-test, and asterisks spanning two bars representing comparisons of the two groups at the 6 hr time point by the 2-tailed unpaired Student's t-test.

# Figure S4

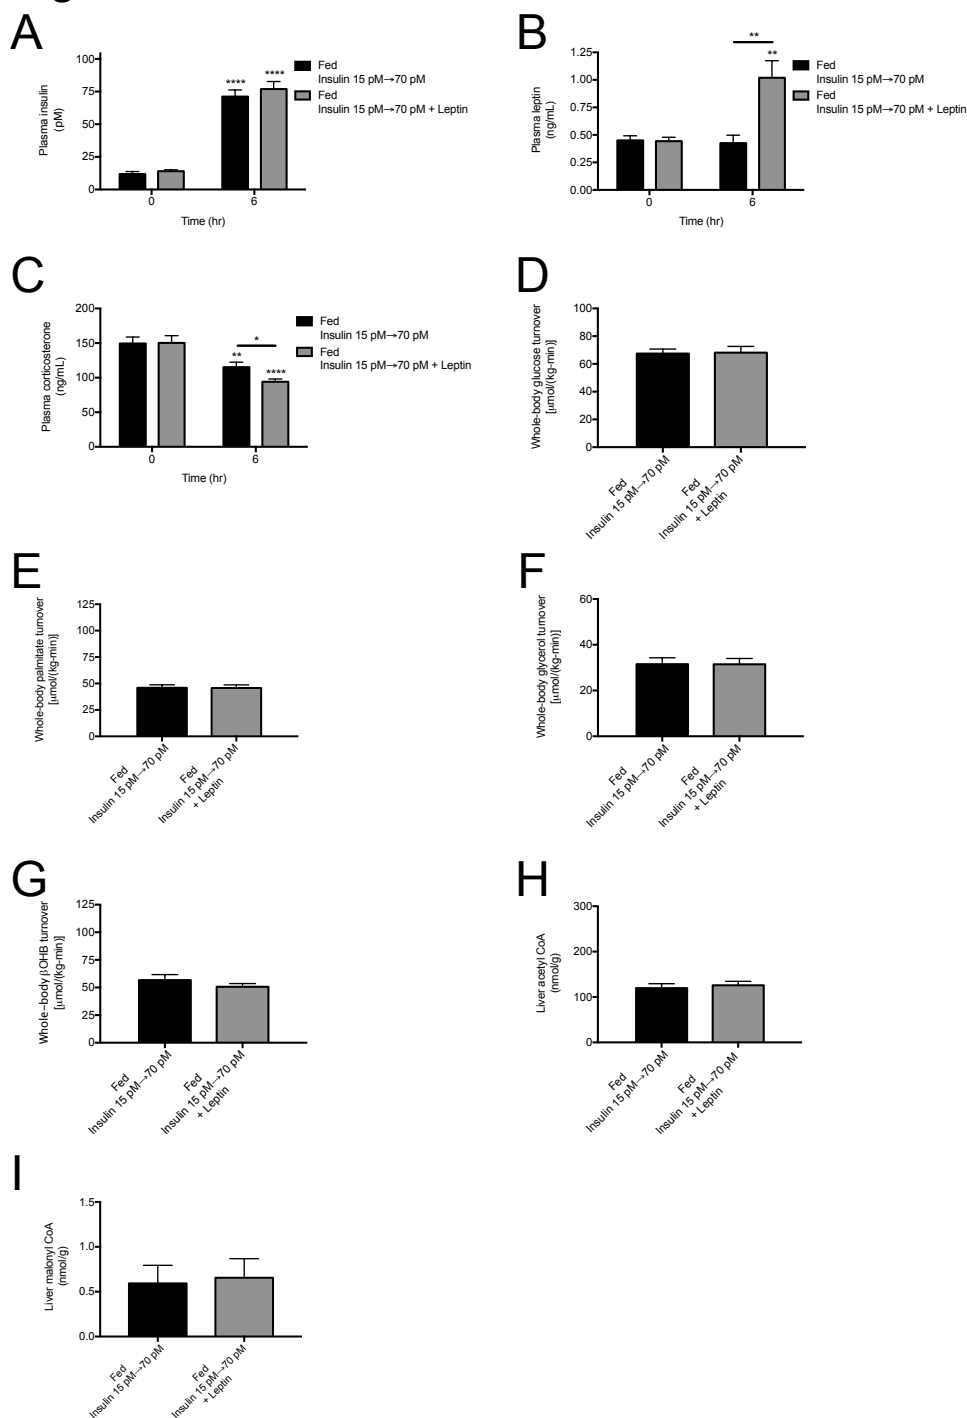

**Figure S4. Leptin does not lower plasma glucose concentrations in fed rats with plasma insulin ~70 pM.** (A)-(C) Plasma insulin, leptin, and corticosterone concentrations. (D)-(G) Whole-body glucose, palmitate, glycerol, and  $\beta\text{OHB}$  turnover. (H)-(I) Liver acetyl and malonyl CoA concentrations. In all panels, data are the mean  $\pm$  S.E.M. of  $n=10-11$  per group. \* $P<0.05$ , \*\* $P<0.01$ , \*\*\*\* $P<0.0001$ , with asterisks directly over the bars representing comparisons to the same group at time zero by the 2-tailed paired Student's t-test, and asterisks spanning two bars representing comparisons of the two groups at the 6 hr time point by the 2-tailed unpaired Student's t-test.

Figure S5

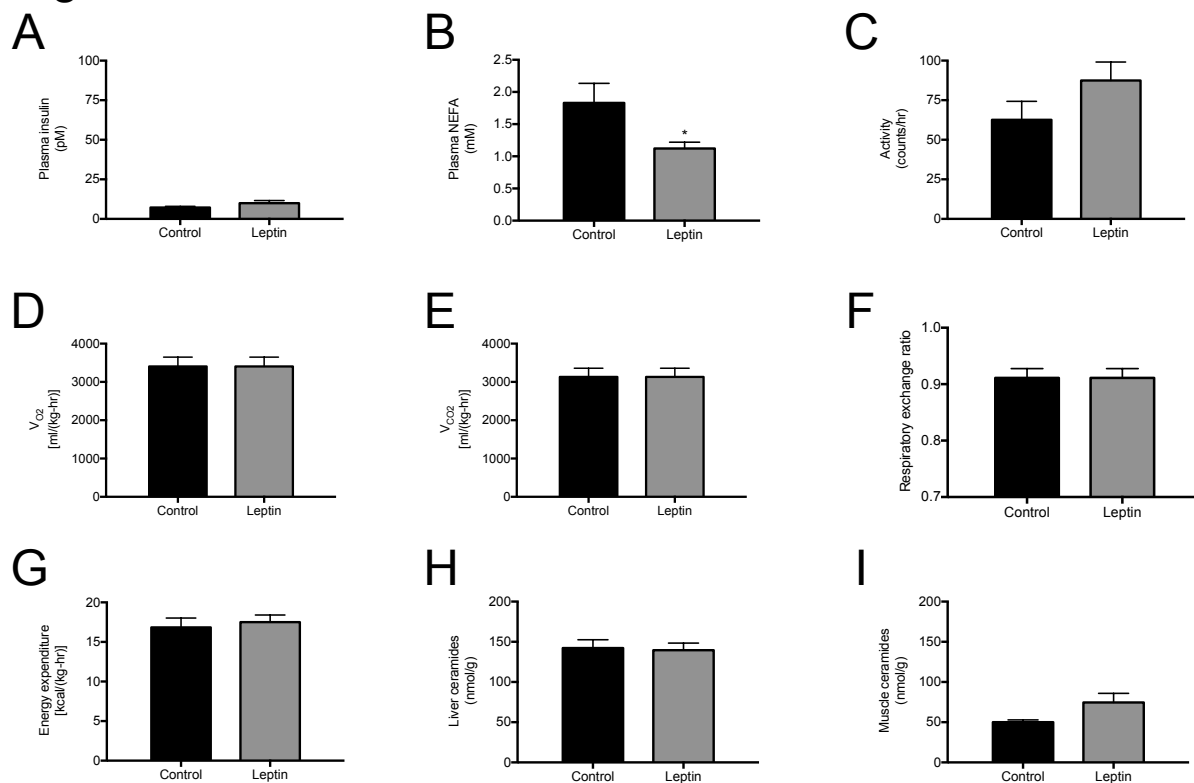

**Fig. S5. The chronic effect of leptin to suppress hyperglycemia in T1D mice is pleotropic.** (A)-(B) Plasma insulin and NEFA concentrations in chronic leptin-treated mice. \* $P < 0.05$  by the 2-tailed unpaired Student's t-test. (C)-(E) Activity,  $VO_2$ , and  $VCO_2$ . (F) Respiratory exchange ratio. (G) Energy expenditure. (H)-(I) Liver and skeletal muscle ceramide concentrations. Data are the mean  $\pm$  S.E.M. of  $n=8$  (control) or 10 (leptin-treated) per group.
